# Supplementary material for: Mutations in DNA repair genes are associated with increased neo-antigen load and activated T cell infiltration in lung adenocarcinoma
Source: PubMed Central journal article supplement (PMC5814272; doi:10.18632/oncotarget.23742), 2017-12-15
Supplement: oncotarget-09-7949-s001.pdf [file oncotarget-09-7949-s001.pdf]

# Mutations in DNA repair genes are associated with increased neo-antigen load and activated T cell infiltration in lung adenocarcinoma

## SUPPLEMENTARY MATERIALS

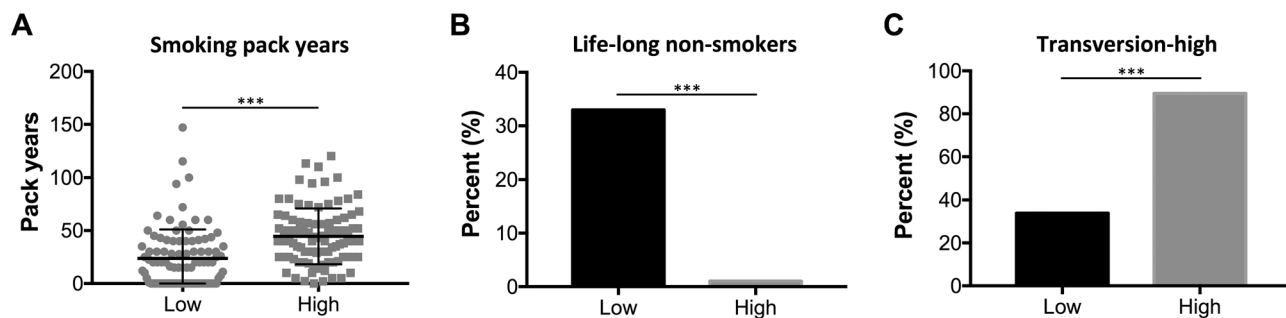

**Supplementary Figure 1: Tumor mutational burden is increased in smokers and contains increased transversions.** High and low total mutational burden tumors classified by (A) patient smoking pack years (results are presented as mean  $\pm$  SEM), (B) percent of life-long non-smokers, and (C) percent of transversion-high tumors. \*\*\*  $P < 0.001$ .

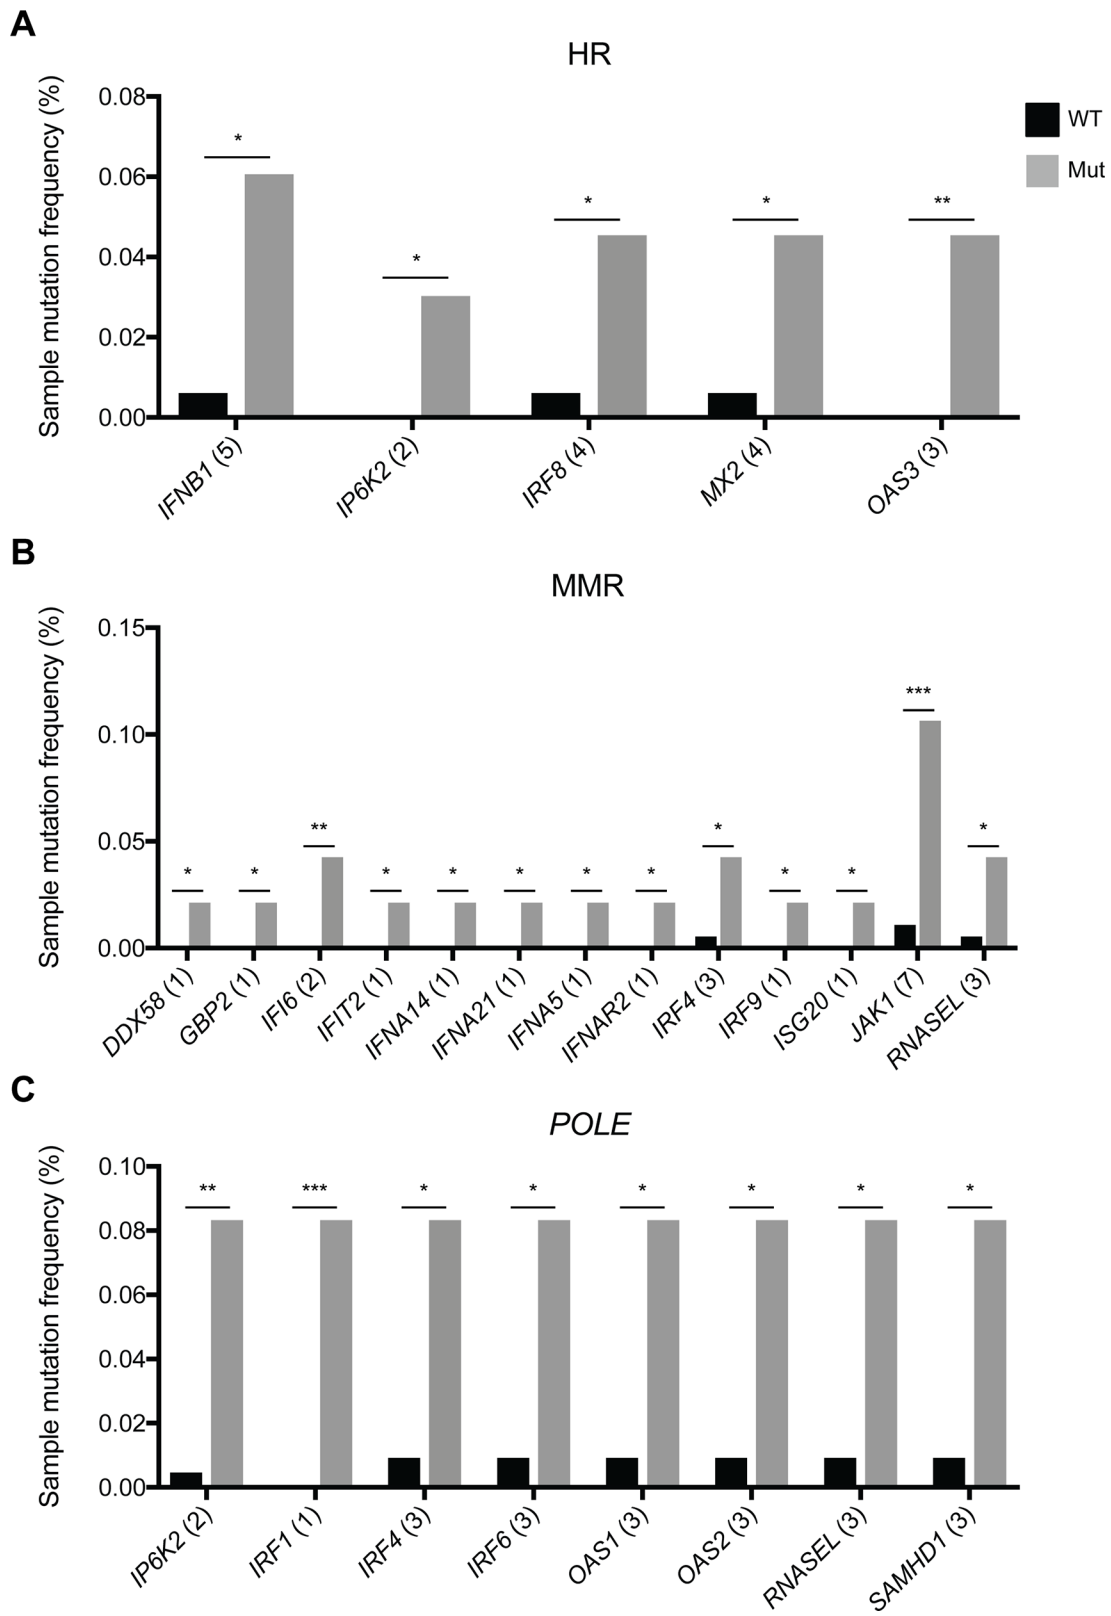

**Supplementary Figure 2: DNA repair mutations are linked to increased frequencies of type I IFN gene mutations.** The mutation frequency of all type I IFN signaling pathway genes (GO: 0060337) with mutation data from the TCGA dataset were analyzed in samples with WT or mutated (A) HR genes, (B) MMR genes, or (C) *POLE*. All genes with significantly altered mutation frequencies are displayed. Numbers in parenthesis indicate the number of samples which contained a mutation in each gene. \*  $P < 0.05$ , \*\*  $P < 0.01$ , \*\*\*  $P < 0.001$ .

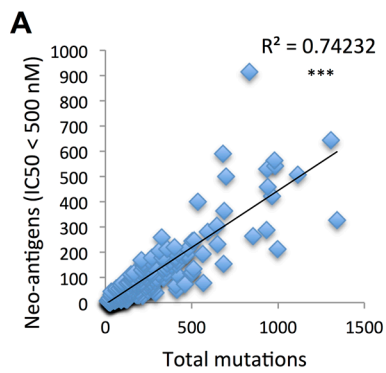

Median neo-antigen count = 59

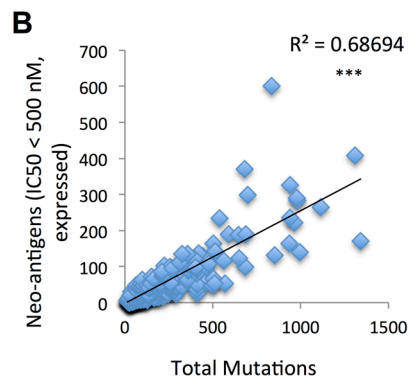

Median neo-antigen count = 38

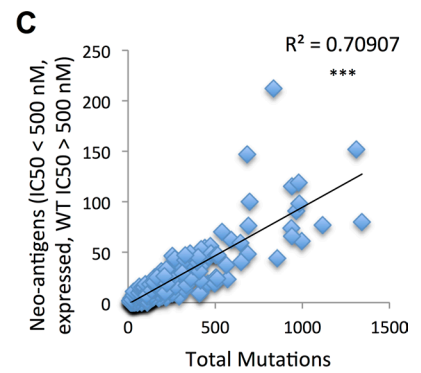

Median neo-antigen count = 12

**Supplementary Figure 3: Filters used in predicting neo-antigen load.** Correlation between neo-antigen load and total mutation count as defined by (A) predicted MHC binding affinity (IC<sub>50</sub> < 500 nM), (B) predicted MHC binding affinity (IC<sub>50</sub> < 500 nM) and positive gene expression, and (C) predicted MHC binding affinity (IC<sub>50</sub> < 500 nM), positive gene expression, and non-mutated parental peptide predicted MHC binding affinity (IC<sub>50</sub> > 500 nM). \*\*\*  $P < 0.001$ .
